# Supplementary material for: CDDO-ME Activates NRF2 to Inhibit The Pro-Invasion Ability of TAMs
Source: Research Square preprint supplement (doi:10.21203/rs.3.rs-113796/v1), 2020-12-07

**CDDO-ME activates NRF2 to inhibit the pro-invasion ability of TAMs**

**Ying Li1*, Yaxu Jia1, Yurong Xu1**

1. Department of Clinical Laboratory, The Affiliated Zhongda Hospital of Southeast University, Nanjing, China

* Correspondence: 554274528@qq.com


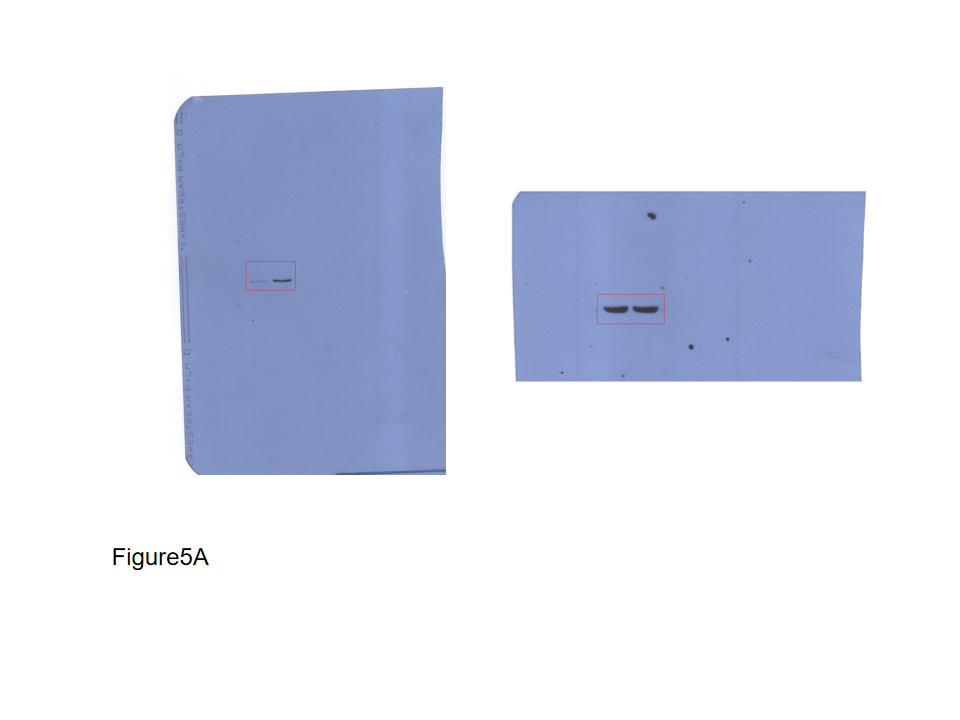

Supplement: Supplementary file 1 [file 8f271517810dc45971fb5626.docx]
